# Supplementary material
Source: PubMed Central journal article supplement (PMC4140650)

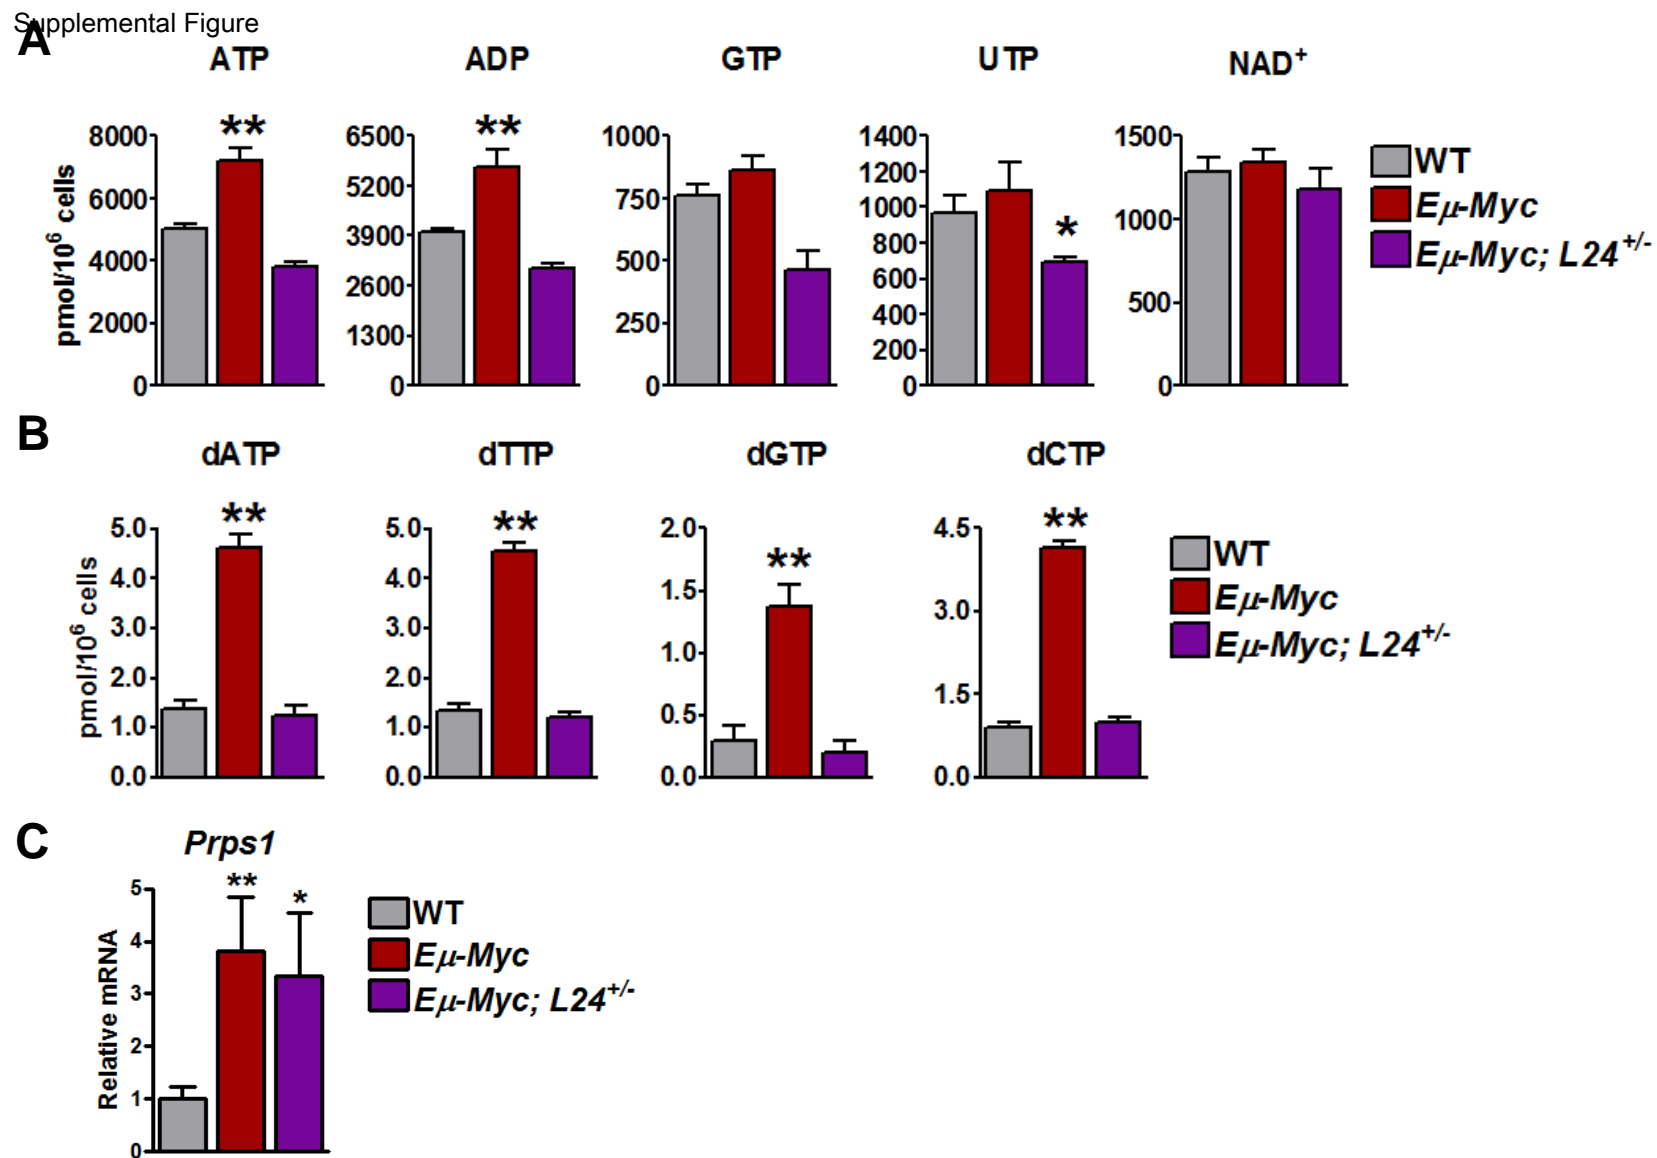

**A**

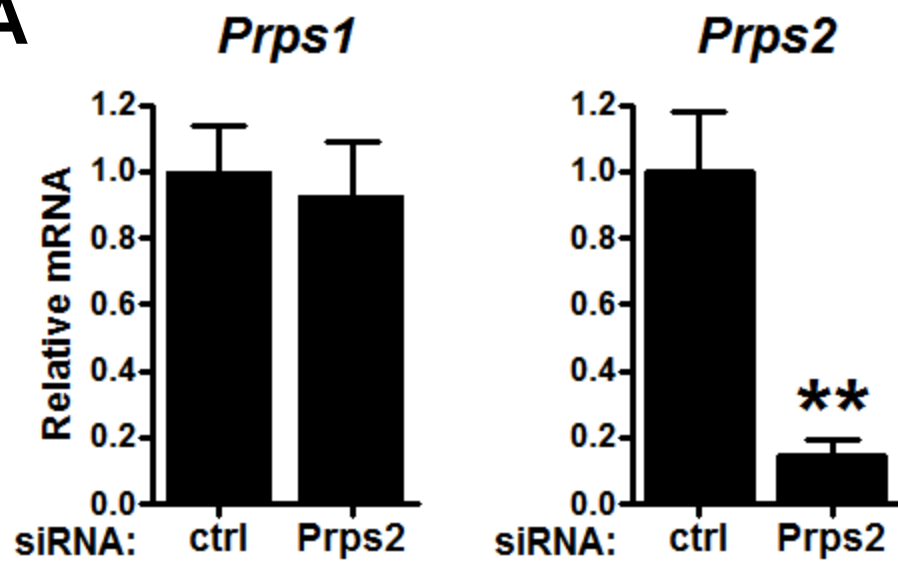

**A**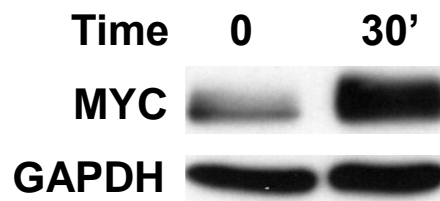**B**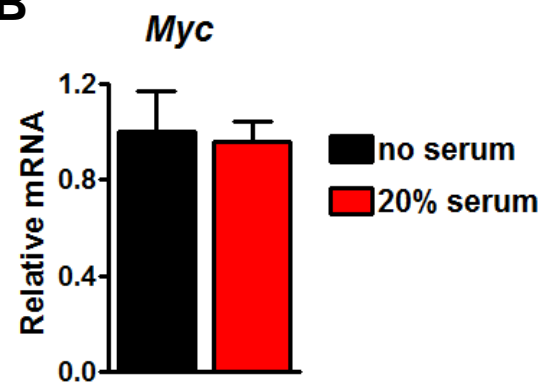**C**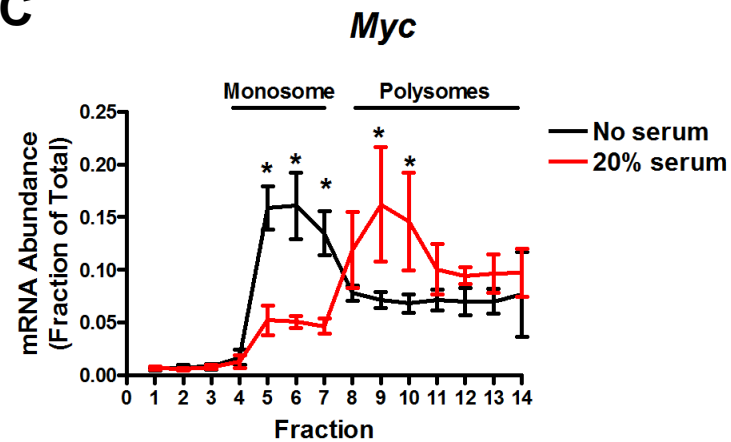**D**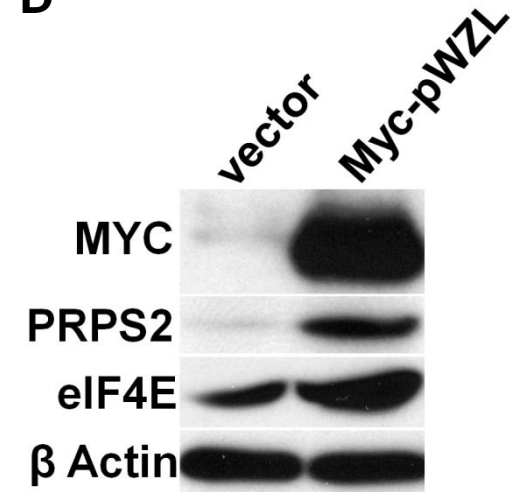**E**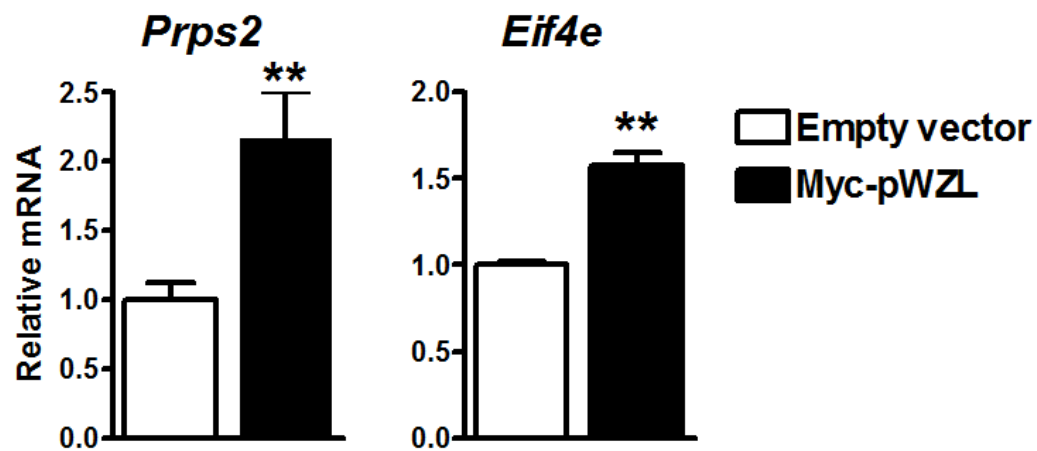

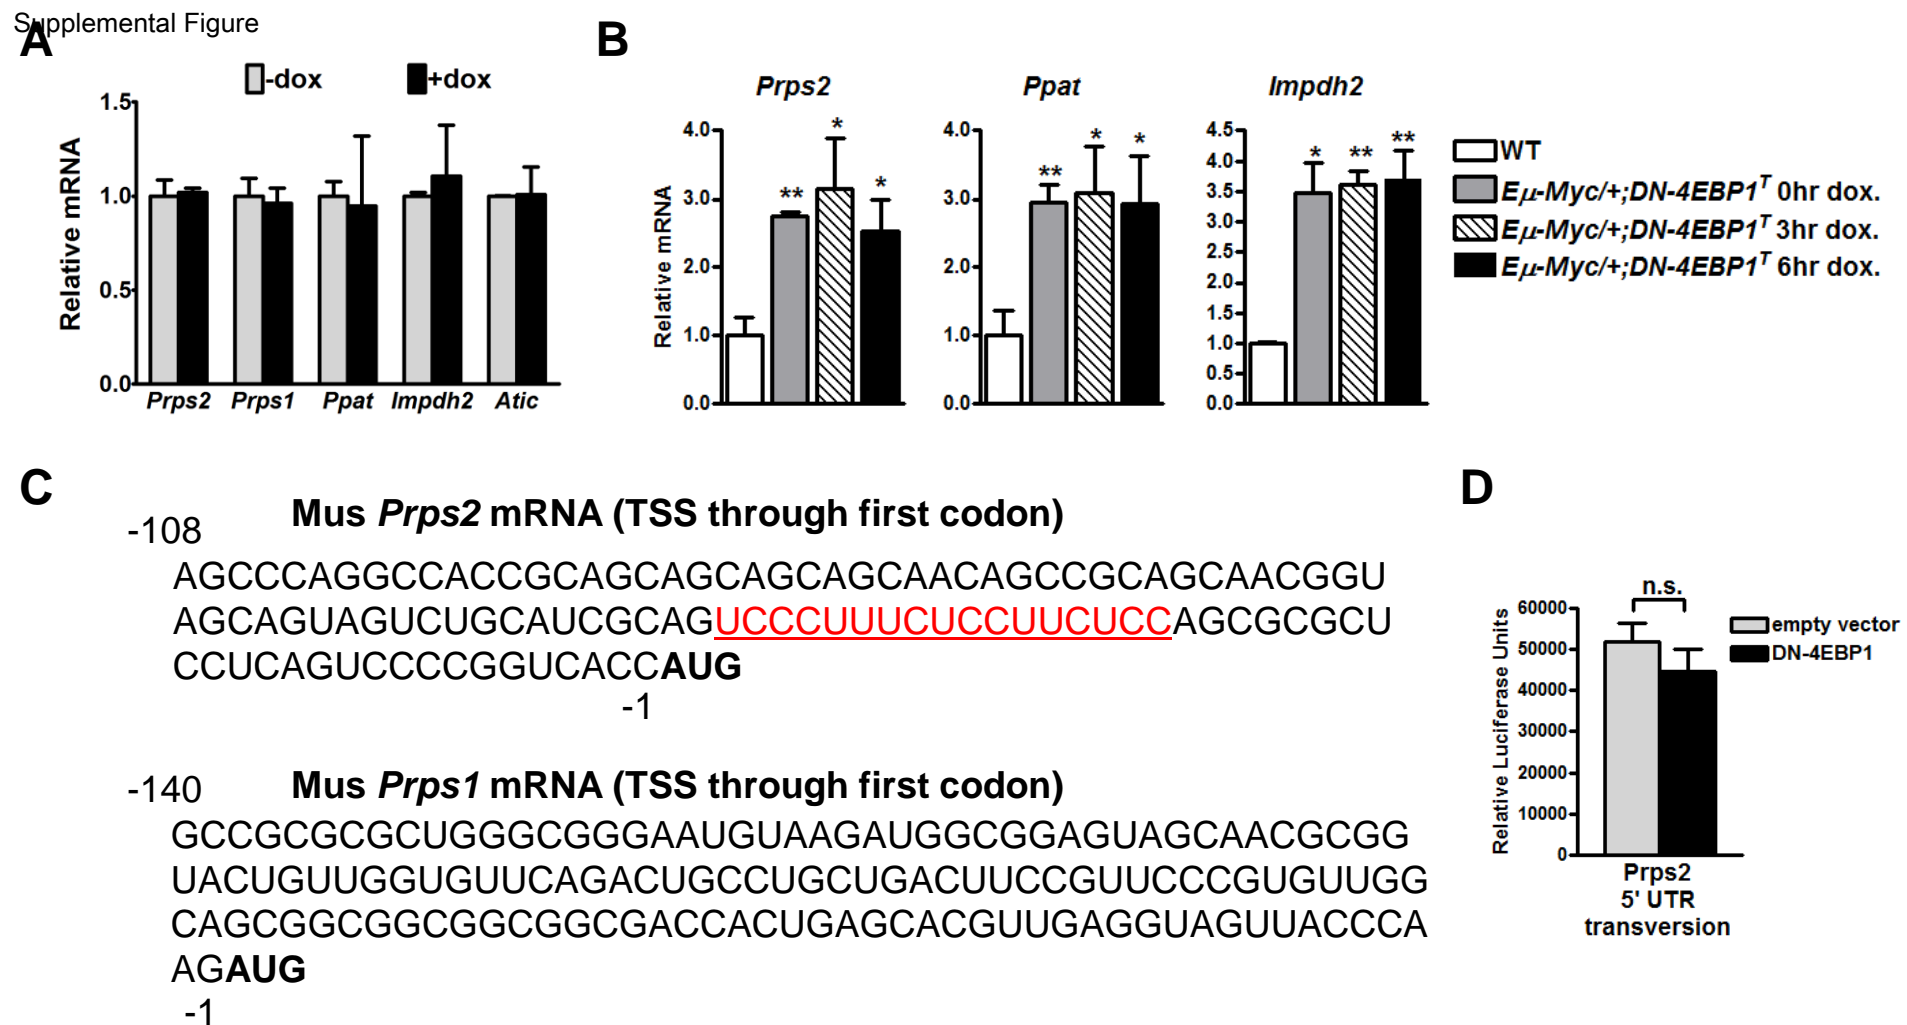

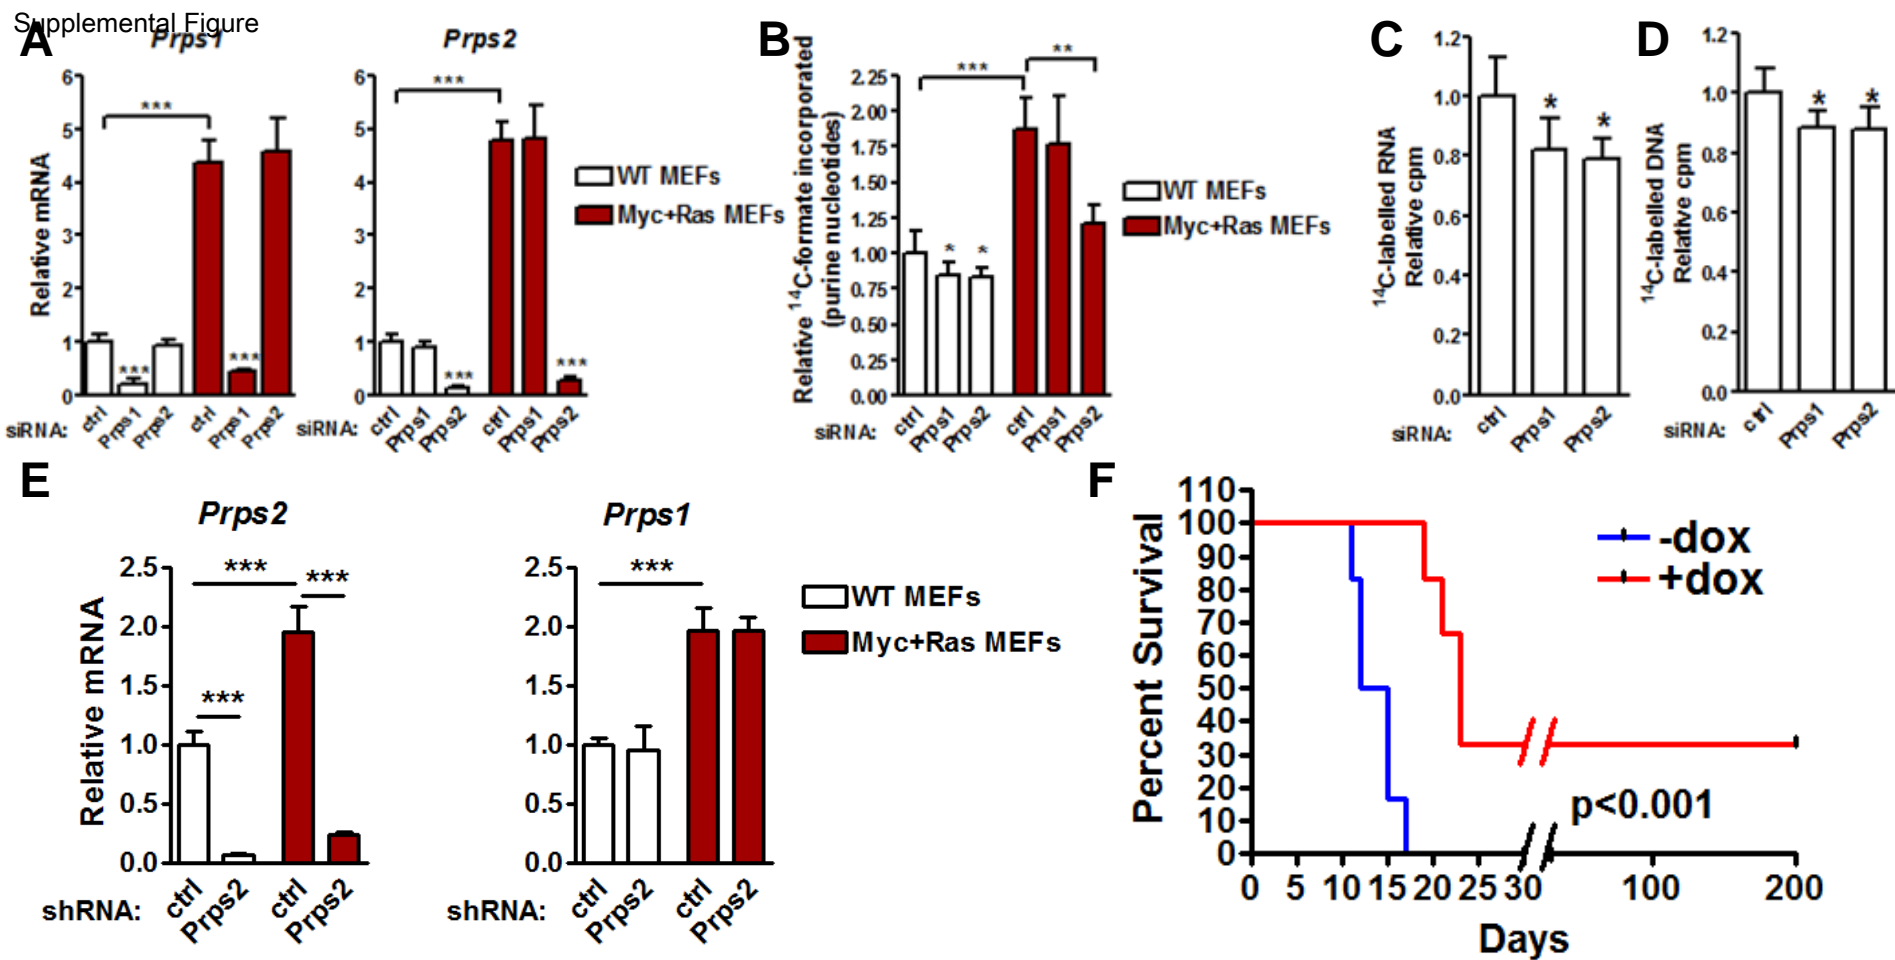

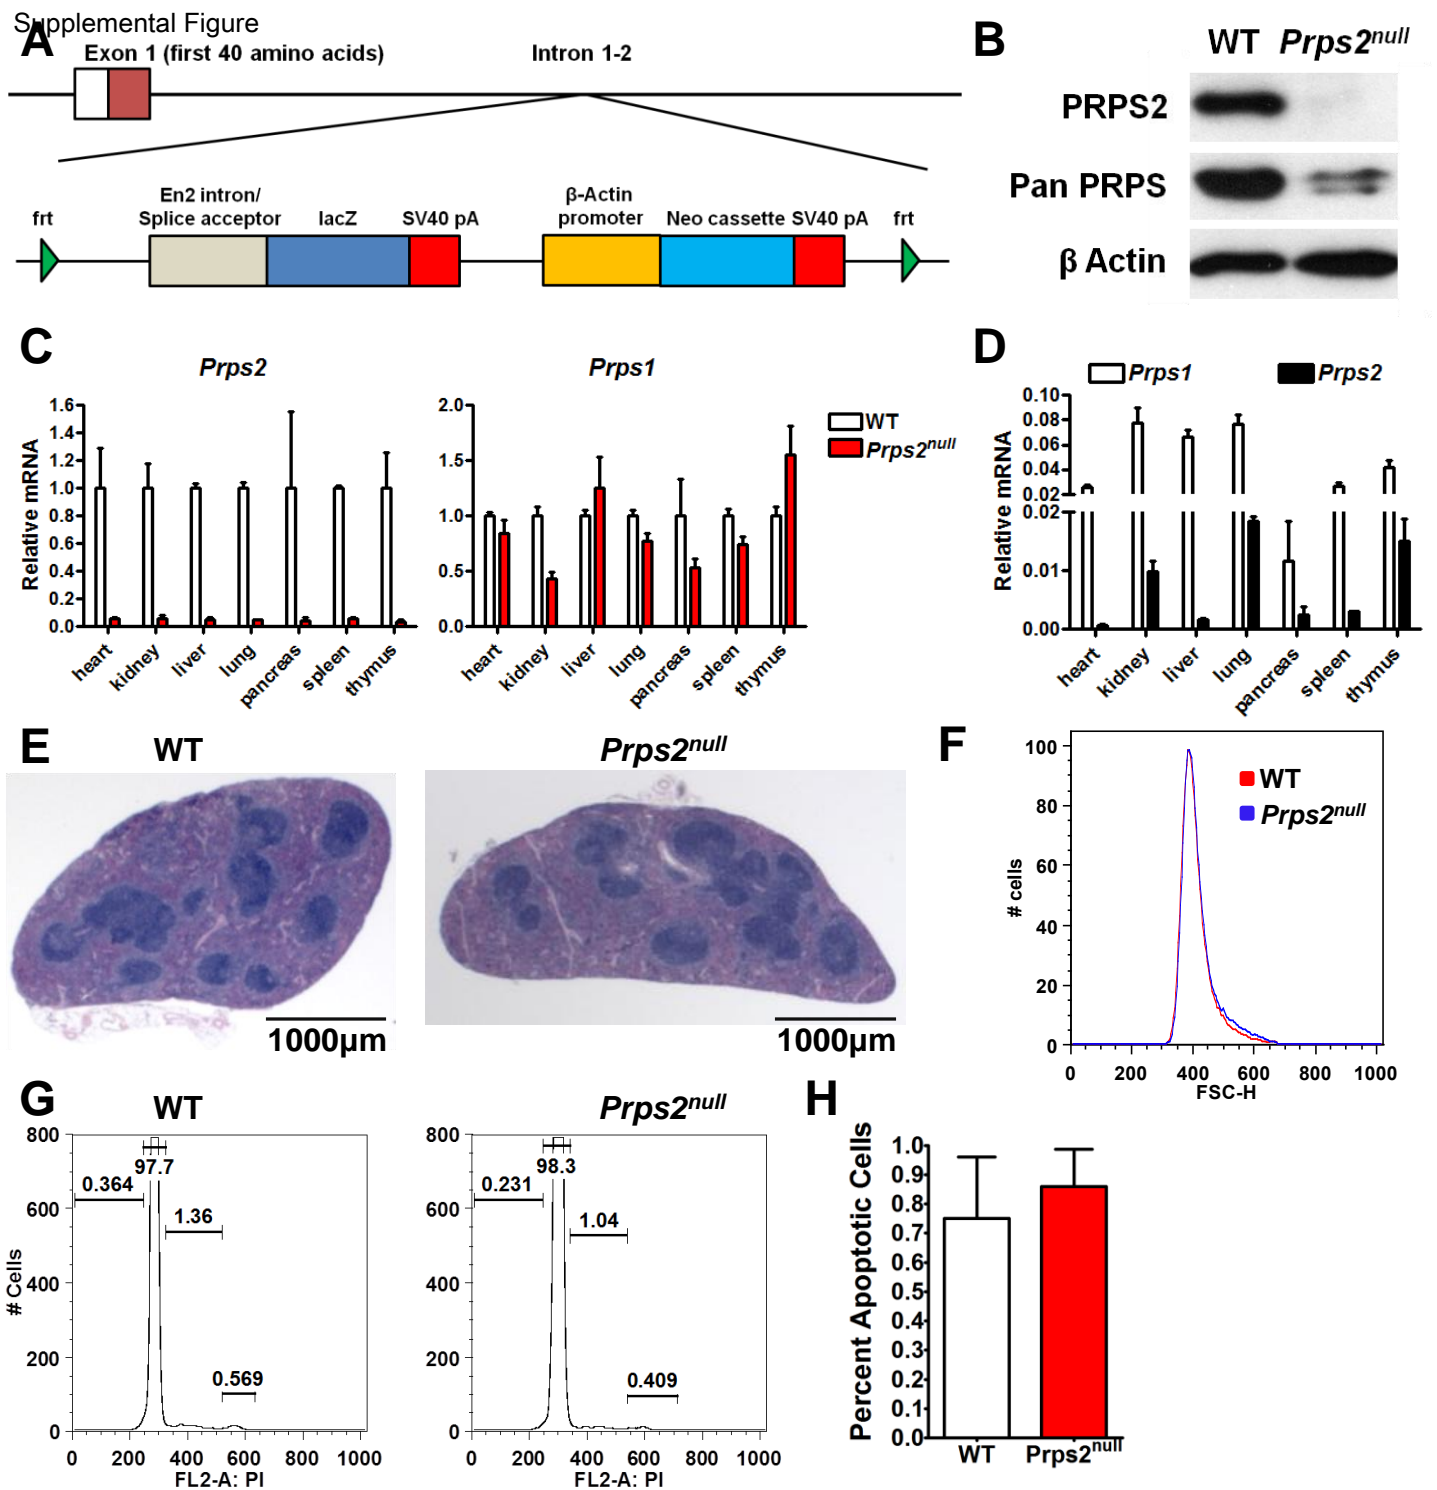

Figure S6

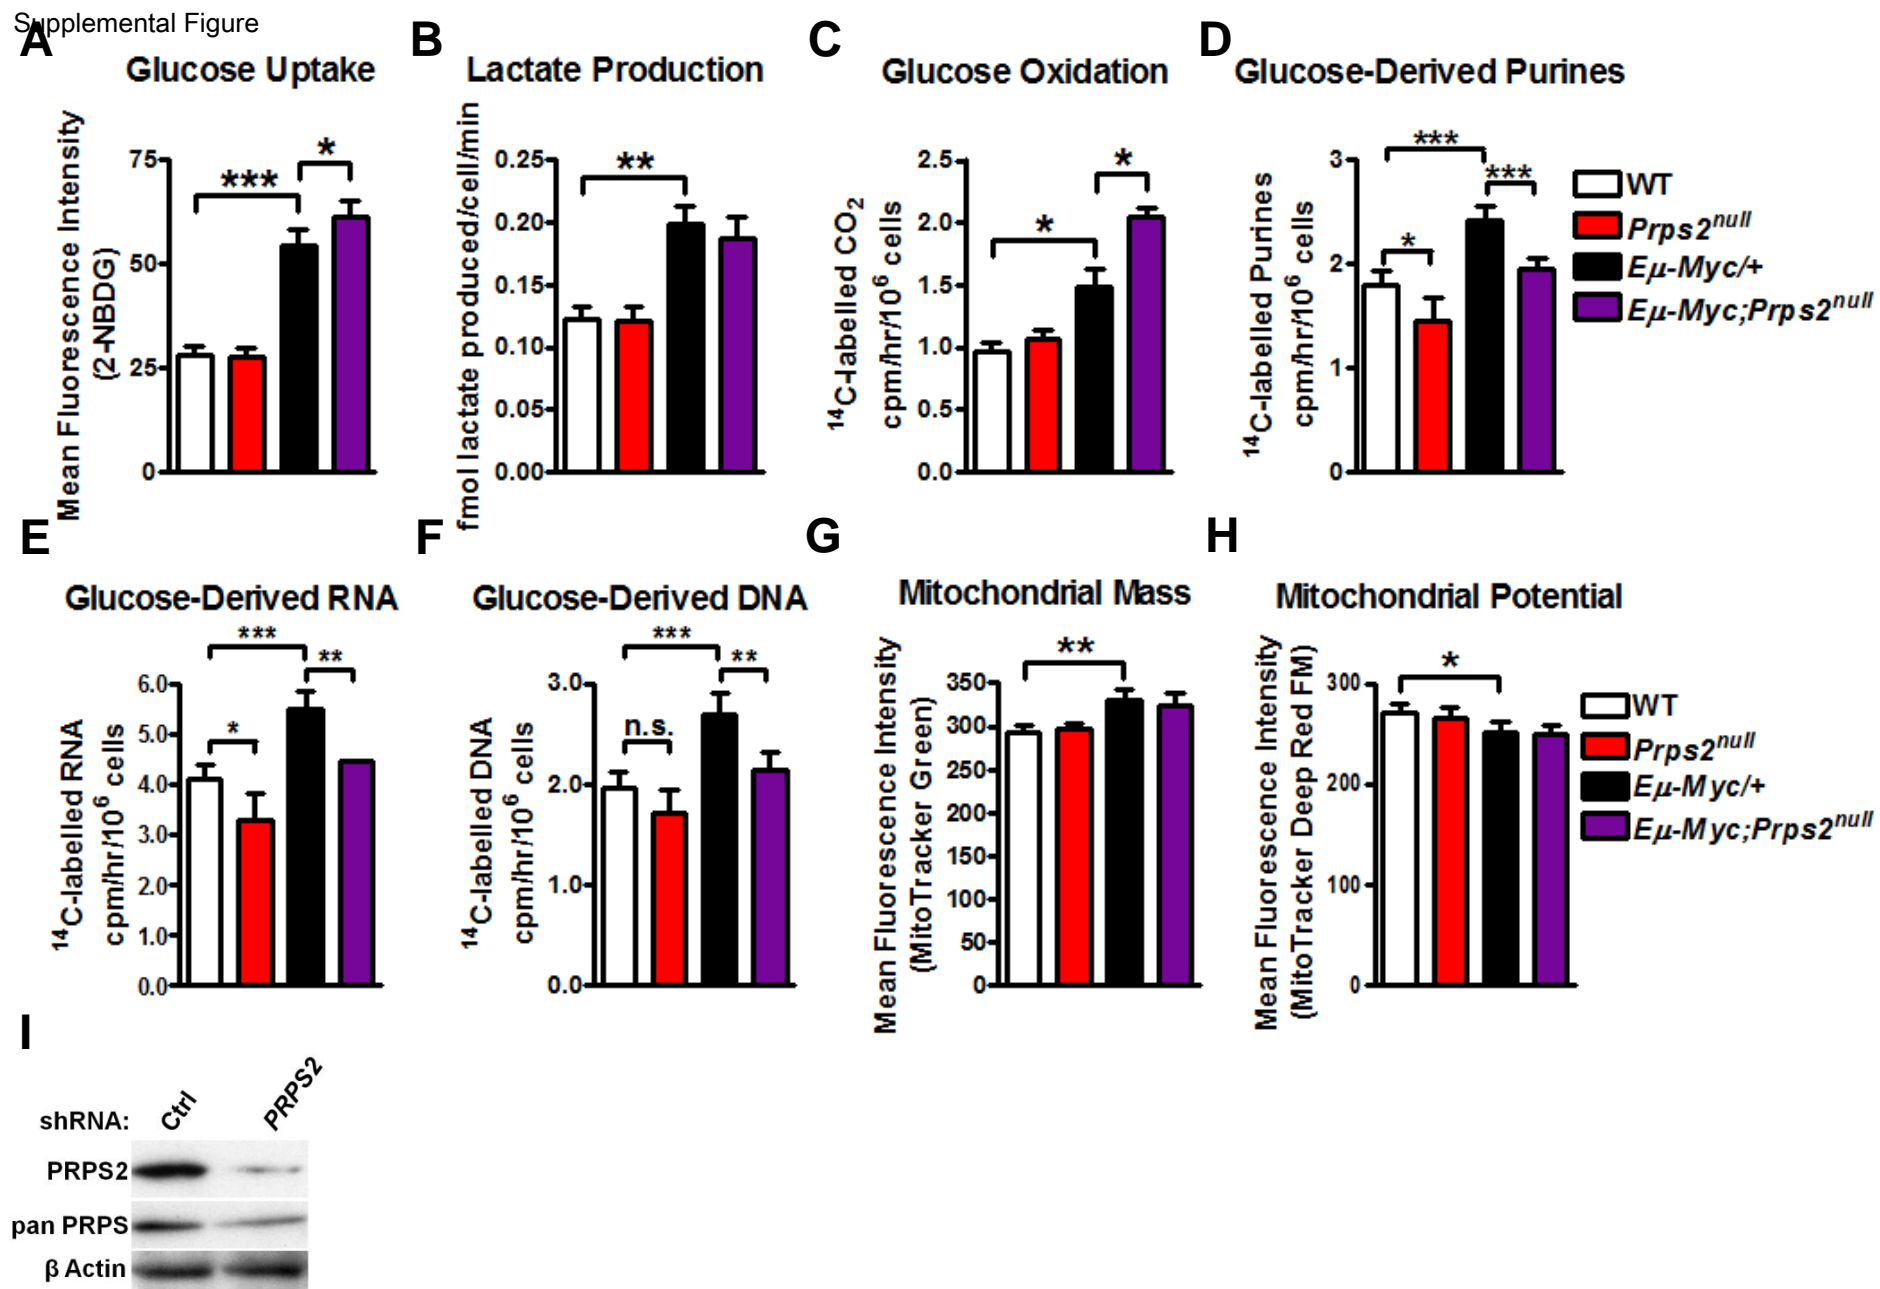

Supplement: NIHMS586247-supplement-02.pdf [file NIHMS586247-supplement-02.pdf]
